# Supplementary material
Source: MDPI journal article supplement (https://www.mdpi.com/1424-8247/14/6/507)
Supplement: s1 [file s1]

## Supplementary Materials

**Table S1.** Populations of myeloid origin cells, monocytes and neutrophils in the spleen of mice infected with MLD100 of *A. baumannii* ATCC17978, *P. aeruginosa* PAO1 or *E. coli* ATCC25922 strains after 24 h.

|                                | <b>C11b+ myeloid cells<br/>(%)</b> | <b>Ly6Chi monocytes<br/>(%)</b> | <b>Ly6G+ neutrophils<br/>(%)</b> |
|--------------------------------|------------------------------------|---------------------------------|----------------------------------|
| Control                        | 4.55 ± 0.60                        | 0.39 ± 0.08                     | 0.65 ± 0.16                      |
| <i>A. baumannii</i> ATCC 17978 | 2.71 ± 0.32*                       | 0.07 ± 0.01*                    | 0.40 ± 0.09                      |
| <i>P. aeruginosa</i> PAO1      | 2.66 ± 1.05                        | 0.07 ± 0.02*                    | 0.36 ± 0.17                      |
| <i>E. coli</i> ATCC 25922      | 2.71 ± 0.20*                       | 0.18 ± 0.02*                    | 0.74 ± 0.11                      |

Data are representative of six mice per group, and expressed as mean ± SEM.

\* $P < 0.05$ : infected mice vs. control.

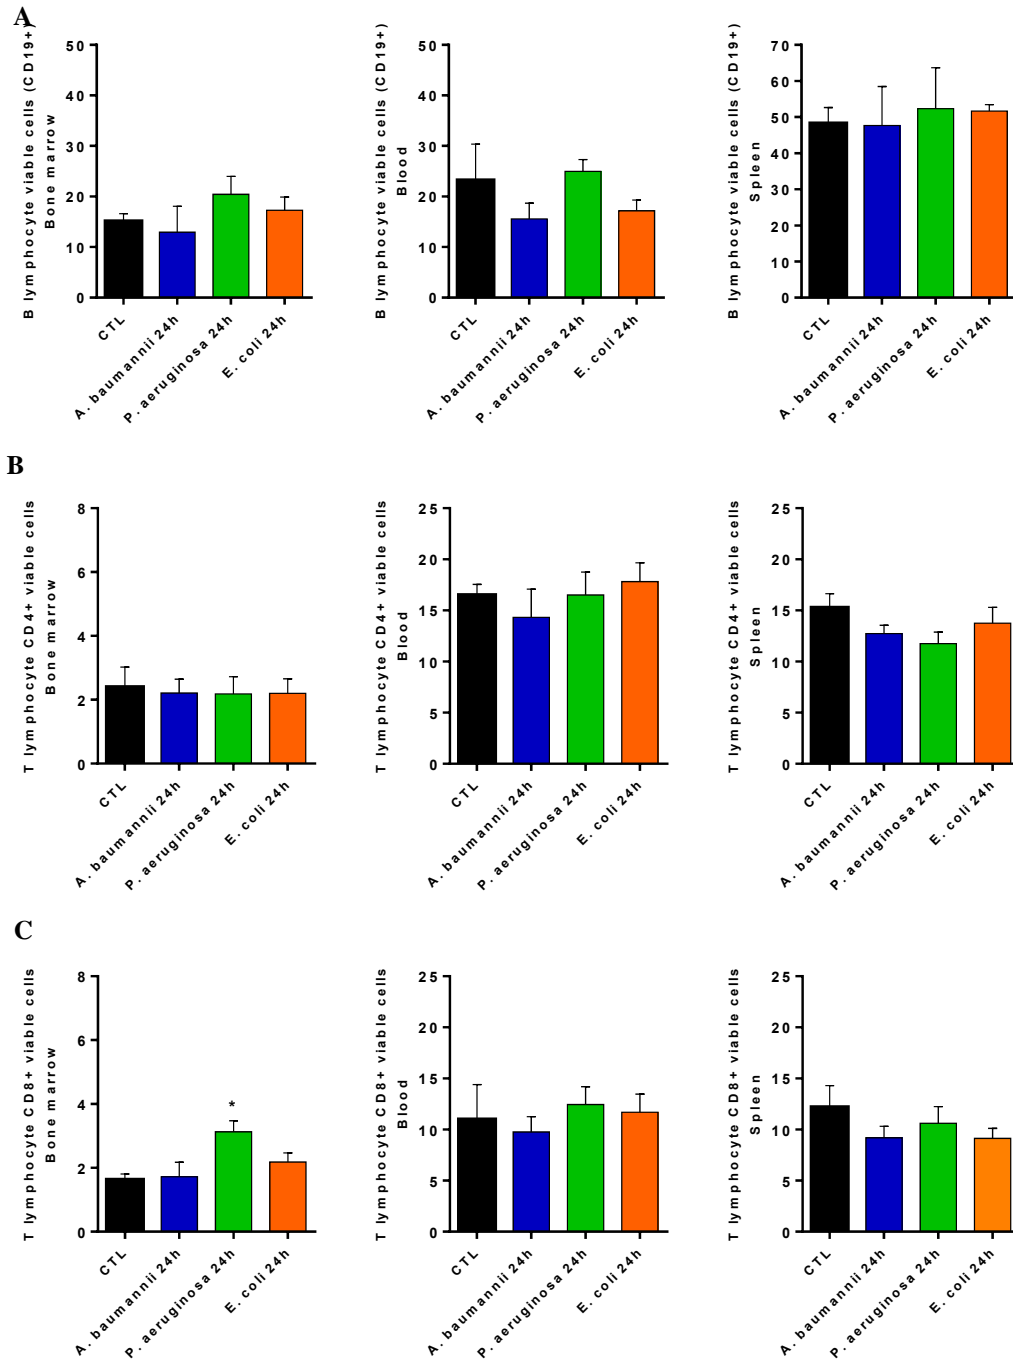

**Figure S1. Populations of B lymphocytes and T lymphocytes CD4+ and CD8+ in bone marrow, blood and spleen during bacterial infection.** (A) B lymphocytes, (B) T lymphocytes CD4+ and (C) T lymphocytes CD8+ were identified as CD19+, CD4+ and CD8+ by flow cytometry, respectively, in bone marrow, blood and spleen of mice infected with MLD100 of *A. baumannii* ATCC17978, *P. aeruginosa* PAO1 or *E. coli* ATCC25922 strains for 24h. Data are representative of six mice per group, and expressed as mean  $\pm$  SEM. \* $P$ <0.05: infected vs. CTL. CTL: non-infected mice.

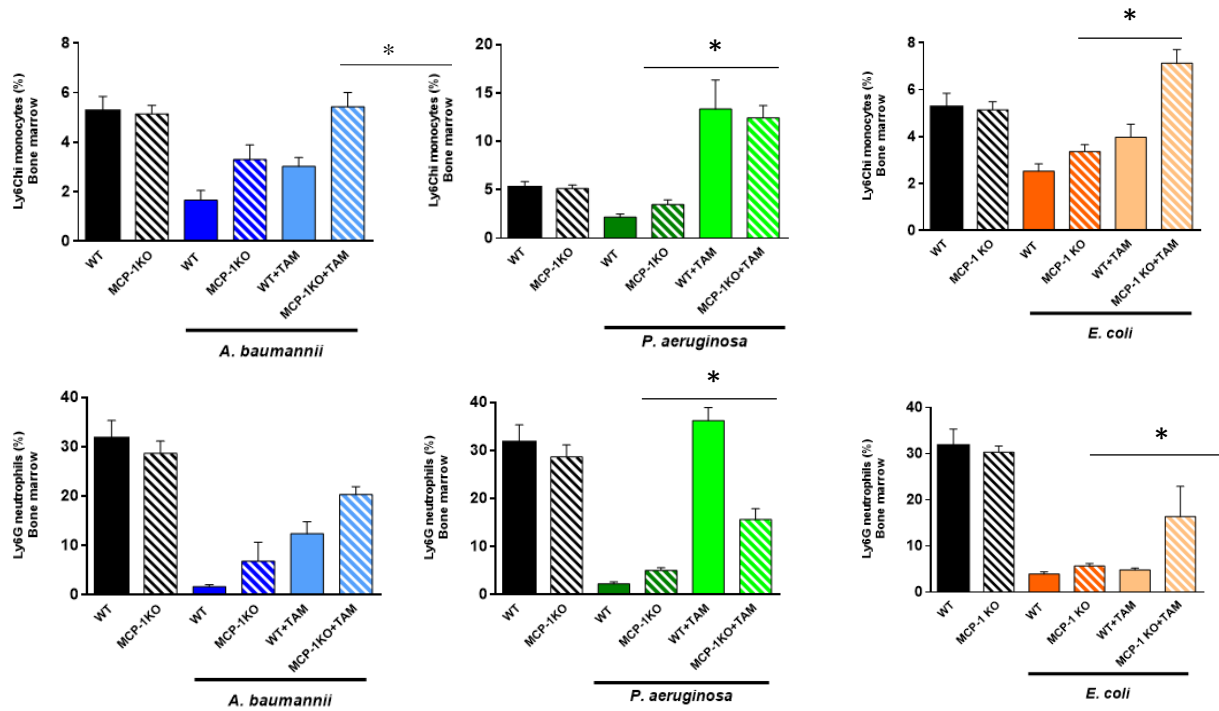

**Figure S2. Role of MCP-1 in the bone marrow immune cells migration to blood during bacterial infection.** Inflammatory monocytes and neutrophils were identified as CD11b+Ly6Chi and CD11b+Ly6G+ by flow cytometry, respectively, in bone marrow of WT and MCP-1 KO mice infected with MLD100 of *A. baumannii* ATCC17978, *P. aeruginosa* PAO1 or *E. coli* ATCC25922 strains for 24 h. Data are representative of six mice per group, and expressed as mean  $\pm$  SEM. \* $P < 0.05$ : MCP-1 KO+TAM vs. MCP-1 KO. WT: wild-type, MCP-1 KO: mice lacking MCP-1. CTL: non-infected mice.

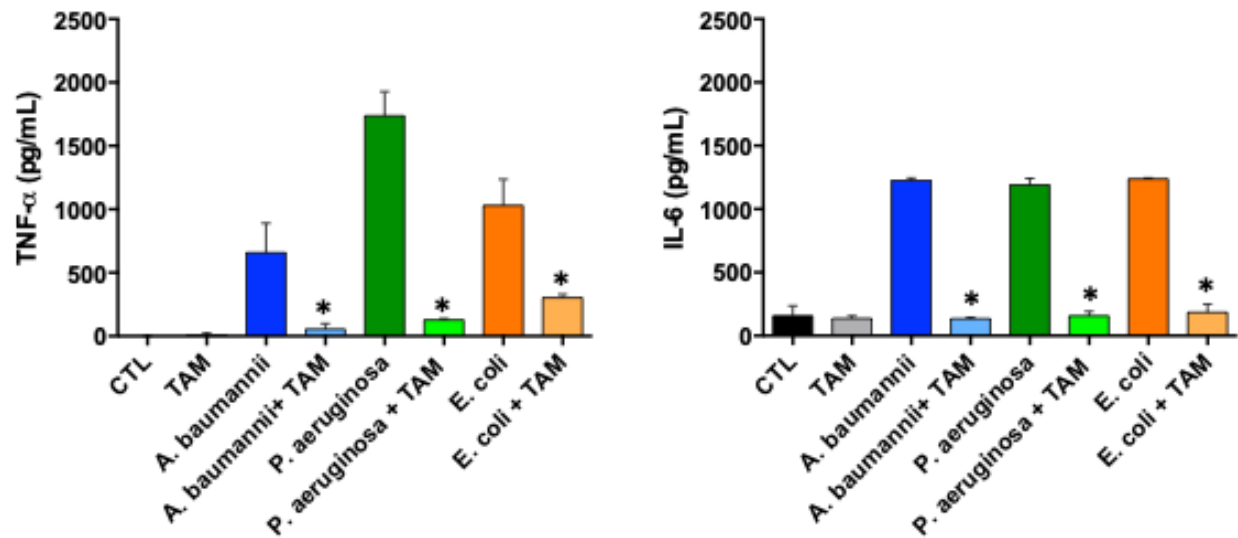

**Figure S3. Tamoxifen effect on cytokines release after bacterial infection.** Mice received tamoxifen (80 mg/kg/d, for 3 days) and infected with minimal lethal dose 100 of *A. baumannii* ATCC17978, *P. aeruginosa* PAO1 or *E. coli* ATCC25922 strains. Twenty-four hours post-infection, (A) TNF- $\alpha$ , and (B) IL-6 were determined by ELISA in blood of mice. Data are representative of 3 mice per group and are expressed as mean  $\pm$  SEM. \* $P < 0.05$ : infected mice vs. infected and treated mice with tamoxifen. CTL: non-infected mice, TAM: tamoxifen.
